# Supplementary material for: 1,3-Thiazolbenzamide Derivatives as Chikungunya Virus nsP2 Protease Inhibitors
Source: PubMed Central journal article supplement — ACS Omega. 2021 Feb 17;6(8):5786–94. doi: 10.1021/acsomega.0c06191 (PMC7931429; doi:10.1021/acsomega.0c06191), 2021-02-17
Supplement: ao0c06191_si_001.pdf [file ao0c06191_si_001.pdf]

## SUPPORTING INFORMATION

### 1,3-Thiazolbenzamide Derivatives as Chikungunya Virus nsP2 Protease Inhibitors

Larisa Ivanova<sup>†</sup>, Kai Rausalu<sup>‡</sup>, Eva Žusinaite<sup>‡</sup>, Jaana Tammiku-Taul<sup>†</sup>, Andres Merits<sup>‡,\*</sup>,  
Mati Karelson<sup>†,\*</sup>

<sup>†</sup>*Institute of Chemistry, University of Tartu, Ravila 14A, 50411 Tartu, Estonia;*

<sup>‡</sup>*Institute of Technology, University of Tartu, Nooruse 1, 50411 Tartu, Estonia*

**Corresponding Authors:**

*E-mails:* [andres.merits@ut.ee](mailto:andres.merits@ut.ee)

[mati.karelson@ut.ee](mailto:mati.karelson@ut.ee)

**Table S1. Calculated Binding Energies, Ligand Efficiencies, and Interactions of CHIKV Inhibitors with IC<sub>50</sub> up to 15 μM with CHIKV nsP2**

| <b>N<sub>2</sub></b> | <b>structure</b>                                                                    | <b>virus strain</b> | <b>IC<sub>50</sub> (μM)</b> | <b>binding energy ΔG (kcal/mol)</b> | <b>ligand efficiency</b> | <b>interactions (H-bonds)</b>                                                                                                | <b>ref.</b> |
|----------------------|-------------------------------------------------------------------------------------|---------------------|-----------------------------|-------------------------------------|--------------------------|------------------------------------------------------------------------------------------------------------------------------|-------------|
| <b>104</b>           | 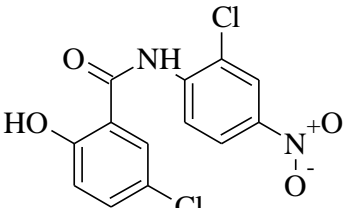   | CHIKV               | 0.95 ± 0.22                 | -6.9                                | 0.33                     | Lys1045, Gly1176, Pro1191, Glu1204, Ile1221, Lys1239                                                                         | [1]         |
|                      |                                                                                     | CHIKV 0611aTw       | 0.85 ± 0.12                 |                                     |                          |                                                                                                                              |             |
|                      |                                                                                     | CHIKV 0810bTw       | 0.9 ± 0.12                  |                                     |                          |                                                                                                                              |             |
| <b>105</b>           |    | CHIKV               | 2.96 ± 0.18                 | -6.1                                | 0.29                     | Lys1045, Pro1191, Leu1203, Ile1221, Lys1239                                                                                  | [1]         |
|                      |                                                                                     | CHIKV 0611aTw       | 1.96 ± 0.48                 |                                     |                          |                                                                                                                              |             |
|                      |                                                                                     | CHIKV 0810bTw       | 4.95 ± 0.23                 |                                     |                          |                                                                                                                              |             |
| <b>154</b>           |    | CHIKV-Gluc          | 13.1 ± 1.1                  | -7.2                                | 0.23                     | Lys1045, Gly1176, Tyr1177, Leu1203, His1222, Lys1239                                                                         | [1]         |
| <b>157</b>           |   | CHIKV-Gluc          | 12.3 ± 0.6                  | -8.2                                | 0.19                     | Gln1039, Glu1043, Lys1045, Pro1191, Leu1192, Asn1202, Leu1203, Ile1221, His1222, Thr1223, Pro1224, Asp1235, Lys1239, Leu1243 | [1]         |
| <b>158</b>           |  | CHIKV-Gluc          | 13.0 ± 2.8                  | -8.3                                | 0.19                     | Lys1045, Gly1176, Tyr1177, Leu1203, His1222, Lys1239                                                                         | [1]         |

|            |                                                                                     |                |                 |      |      |                                                                                                                      |     |
|------------|-------------------------------------------------------------------------------------|----------------|-----------------|------|------|----------------------------------------------------------------------------------------------------------------------|-----|
| <b>159</b> | 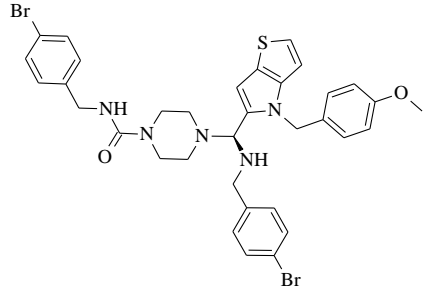   | CHIKV-<br>Gluc | $10.9 \pm 1.3$  | -8.7 | 0.20 | Gln1039, Glu1043, Lys1045, Gly1176, Tyr1177, Pro1191, Leu1203, His1222, Pro1224, Lys1239 ( $NH_3^+ \dots O(ether)$ ) | [1] |
| <b>160</b> |    | CHIKV-<br>Gluc | $13.3 \pm 0.1$  | -7.2 | 0.21 | Lys1045, Tyr1177, Leu1203, Ile1221, His1222, Lys1239                                                                 | [1] |
| <b>162</b> |    | CHIKV-<br>Gluc | $7.59 \pm 2.17$ | -7.1 | 0.21 | Lys1045, Gly1176, Leu1203, Ile1221, His1222, Lys1239                                                                 | [1] |
| <b>163</b> |   | CHIKV-<br>Gluc | $10.4 \pm 0.8$  | -7.6 | 0.22 | Gly1176, Leu1203, Ile1221, His1222, Lys1239                                                                          | [1] |
| <b>164</b> |  | CHIKV-<br>Gluc | $11.0 \pm 0.4$  | -7.3 | 0.19 | Lys1045, Gly1176, Tyr1177, Leu1203, Ile1221, Lys1239                                                                 | [1] |

|     |                                                                                     |            |                 |      |      |                                                                                                  |     |
|-----|-------------------------------------------------------------------------------------|------------|-----------------|------|------|--------------------------------------------------------------------------------------------------|-----|
| 165 | 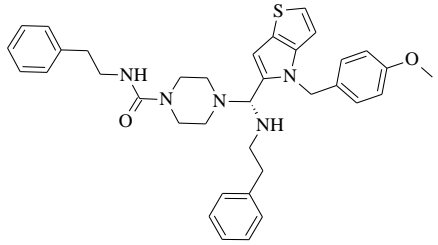   | CHIKV-Gluc | $11.1 \pm 0.1$  | -8.2 | 0.18 | Lys1045, Gly1176, Tyr1177, Leu1203, Ile1221, His1222, Lys1239                                    | [1] |
| 169 |    | CHIKV-Gluc | $9.44 \pm 0.06$ | -8.7 | 0.21 | Lys1045, Tyr1177, Pro1191, Leu1203, Ile1221, Pro1224, Lys1239 ( $NH_3^+ \dots O(ether)$ )        | [1] |
| 175 |    | CHIKV-Gluc | $3.1 \pm 0.71$  | -7.3 | 0.25 | Gly1176, Tyr1177, Pro1191, Asn1202, Leu1203, Ile1221, His1222, Lys1239                           | [1] |
| 177 |   | CHIKV-Gluc | $8.44 \pm 2.21$ | -8.0 | 0.21 | Gly1176, Pro1191, Leu1192, Asn1202 ( $O \dots HN$ ), Leu1203, Glu1204, Ile1221, His1222, Lys1239 | [1] |
| 178 |  | CHIKV-Gluc | $11.2 \pm 3.4$  | -7.9 | 0.21 | Tyr1177, Pro1191, Leu1192, Asn1202, Leu1203, Glu1204, His1222, Lys1239                           | [1] |

|     |  |                |                 |      |      |                                                                                                  |     |
|-----|--|----------------|-----------------|------|------|--------------------------------------------------------------------------------------------------|-----|
| 179 |  | CHIKV-<br>Gluc | $4.33 \pm 0.86$ | -7.7 | 0.26 | Tyr1177, Pro1191, <i>Leu1192</i><br>(NH...OH), Asn1202,<br>Leu1203, Ile1221, His1222,<br>Lys1239 | [1] |
| 180 |  | CHIKV-<br>Gluc | $3.6 \pm 0.41$  | -7.6 | 0.26 | Gly1176, Tyr1177, Pro1191,<br>Asn1202, Leu1203, Ile1221,<br>His1222, Lys1239                     | [1] |
| 181 |  | CHIKV-<br>Gluc | $3.85 \pm 0.06$ | -7.7 | 0.23 | Pro1191, Leu1192, Leu1203,<br>Ile1221, His1222                                                   | [1] |
| 182 |  | CHIKV-<br>Gluc | $4.9 \pm 0.16$  | -7.4 | 0.25 | Gly1176, Tyr1177, Pro1191,<br>Leu1203, Ile1221, His1222,<br>Lys1239                              | [1] |
| 183 |  | CHIKV-<br>Gluc | $7.75 \pm 0.23$ | -7.6 | 0.26 | Pro1191, Leu1203, Ile1221,<br>His1222, Lys1239                                                   | [1] |

|     |                                                                                     |                |                |      |      |                                                                                                                                       |     |
|-----|-------------------------------------------------------------------------------------|----------------|----------------|------|------|---------------------------------------------------------------------------------------------------------------------------------------|-----|
| 186 | 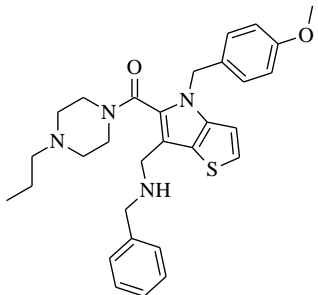   | CHIKV-<br>Gluc | $11.9 \pm 1.9$ | -7.5 | 0.20 | Lys1045, Tyr1177, Pro1191,<br>Leu1203, Ile1221, His1222,<br>Lys1239                                                                   | [1] |
| 242 |    | CHIKV<br>899   | $12 \pm 4$     | -7.0 | 0.33 | Lys1045, Glu1204, Ile1221,<br>Lys1239                                                                                                 | [1] |
| 253 |    | CHIKV<br>899   | $3 \pm 1$      | -7.2 | 0.34 | Pro1191, Leu1192, Leu1203,<br>Glu1204, Lys1239, Leu1243                                                                               | [1] |
| 262 |   | CHIKV<br>899   | 10.2           | -8.6 | 0.24 | Lys1045, Gly1176<br>(NH...O(sulfur)), Tyr1177,<br>Leu1203, Ile1221, His1222<br>(NH...O(sulfur)), Lys1239,<br>Leu1243                  | [1] |
| 275 |  | CHIKV<br>899   | 13             | -8.5 | 0.26 | Lys1155 (NH <sub>3</sub> <sup>+</sup> ...O), Arg1158,<br>Tyr1177, Leu1179, His1222,<br>Phe1225, Gln1232, Arg1260,<br>Thr1292, Glu1296 | [1] |

|     |                                                                                   |              |     |      |      |                                                                                                                                                                                                 |     |
|-----|-----------------------------------------------------------------------------------|--------------|-----|------|------|-------------------------------------------------------------------------------------------------------------------------------------------------------------------------------------------------|-----|
| 282 | 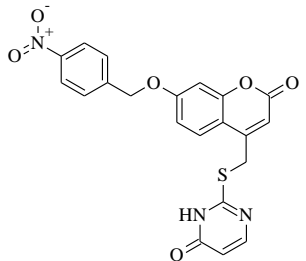 | CHIKV<br>899 | 4.6 | -8.1 | 0.26 | His1151, Lys1155, <i>Gly1156</i> ( <i>NH...O</i> ), Tyr1177, Phe1225, <i>Gln1232</i> ( <i>NH<sub>2</sub>...O<sub>2</sub>N</i> ), <i>Arg1260</i> ( <i>NH<sub>2</sub>...O</i> ), Thr1292, Ser1293 | [1] |
|-----|-----------------------------------------------------------------------------------|--------------|-----|------|------|-------------------------------------------------------------------------------------------------------------------------------------------------------------------------------------------------|-----|

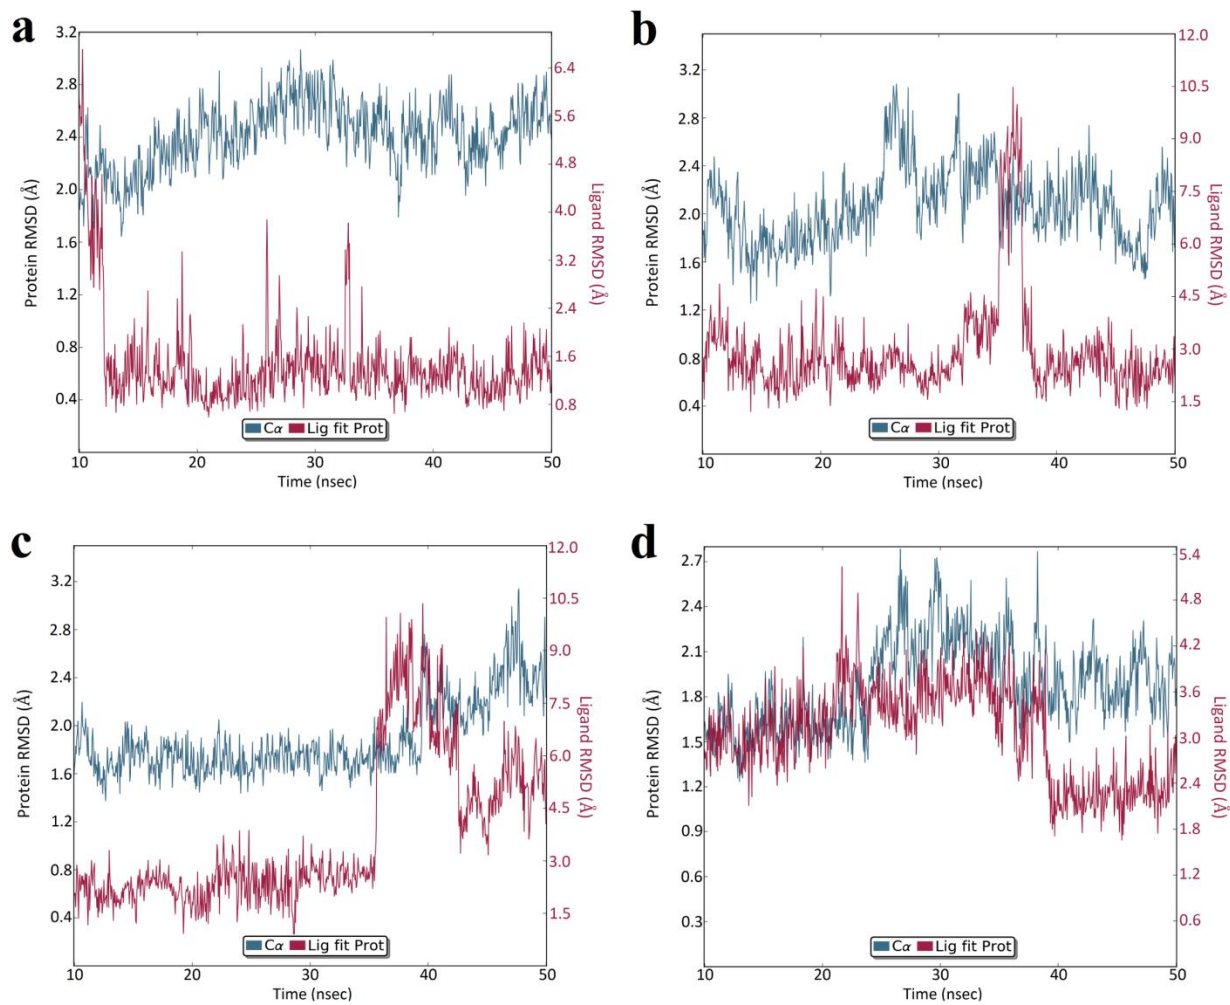

**Figure S1.** RMSD of the atomic positions for compounds **1**, **10**, **10b**, and **10c** (in red, Lig fit Prot) and CHIKV nsP2 ( $C\alpha$  positions in blue) of the 50 ns molecular dynamics simulations using Desmond package: CHIKV nsP2 – compound **1** (a); CHIKV nsP2 – compound **10** (b); CHIKV nsP2 – compound **10b** (c); CHIKV nsP2 – compound **10c** (d). Protein PDB ID: 3TRK.



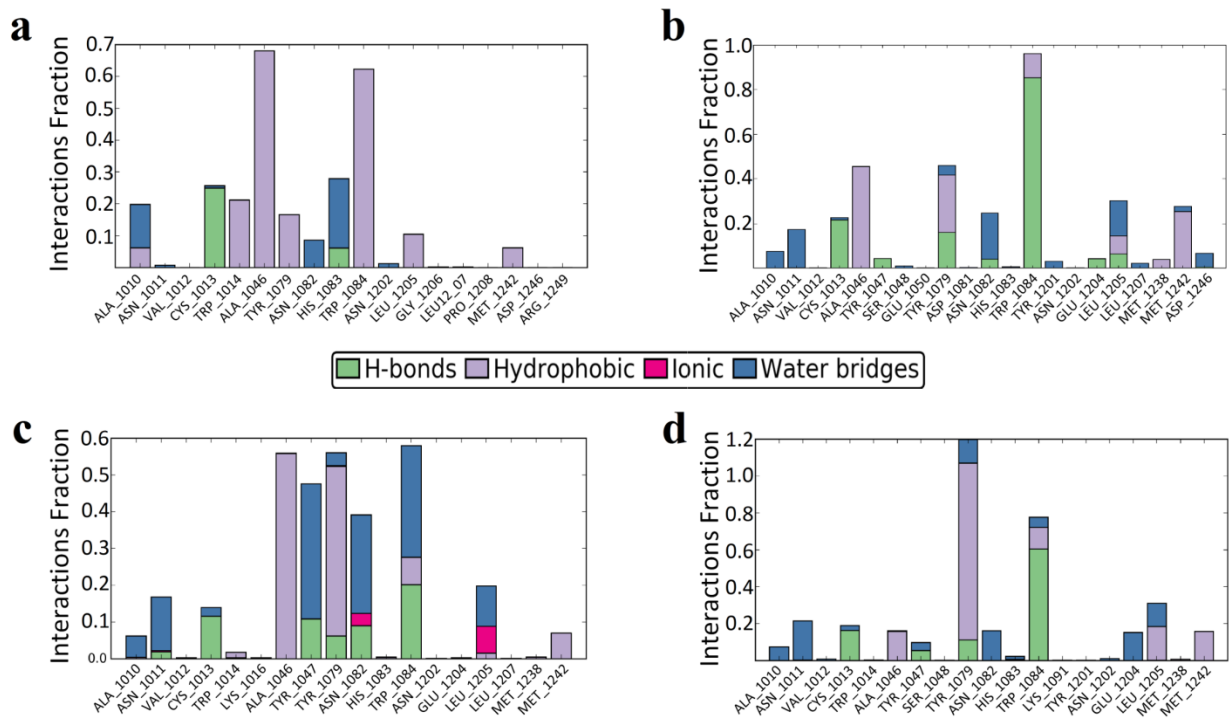

**Figure S2.** MD-calculated contacts for the complexes of CHIKV nsP2 with compounds **1** (a), **10** (b), **10b** (c), and **10c** (d).

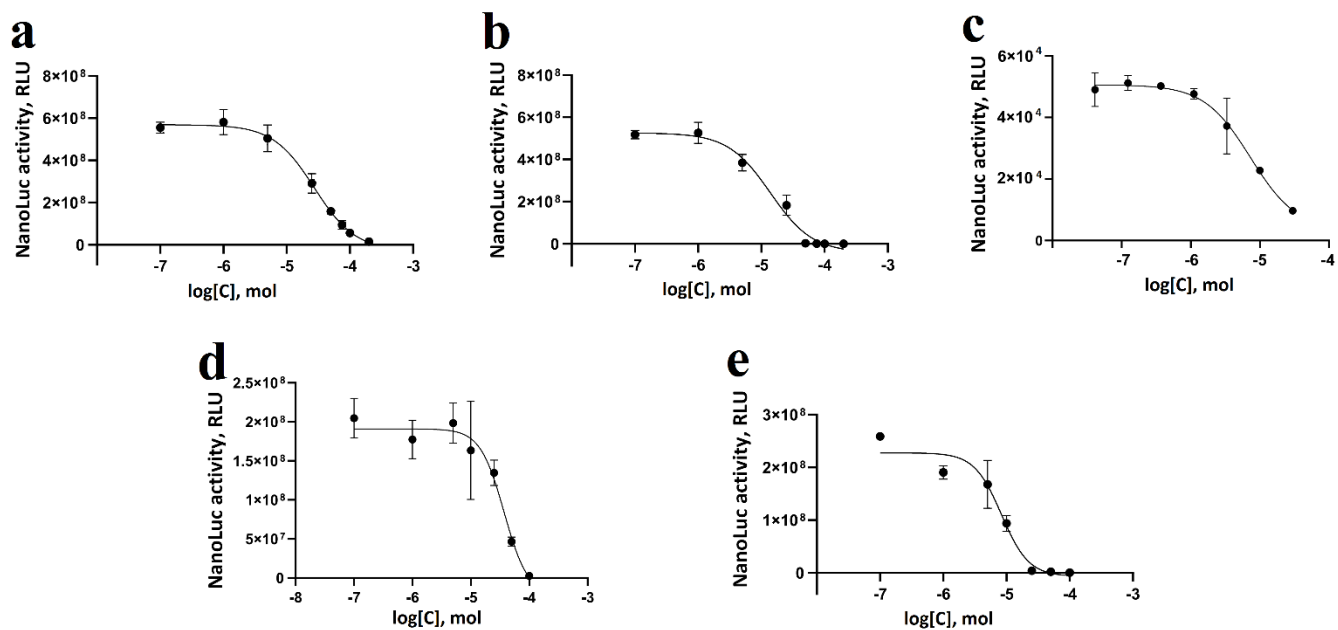

**Figure S3.** Determination of  $IC_{50}$  of compounds **1** (a – BHK-21 cells), **10** (b – BHK-21 cells, c – RPE cells), **10b** (d – BHK-21 cells), and **10c** (e – BHK-21 cells).

## REFERENCES

(1) da Silva-Júnior, E. F.; Leoncini, G. O.; Rodrigues, É. E. S.; Aquino, T. M.; Araújo-Júnior, J. X. The medicinal chemistry of Chikungunya virus. *Bioorg. Med. Chem.* **2017**, *25*, 4219-4244.
